# Supplementary material for: Identification of Novel Insulin Resistance Related ceRNA Network in T2DM and Its Potential Editing by CRISPR/Cas9
Source: MDPI journal article supplement (doi:10.3390/ijms22158129), 2021-07-29
Supplement: s1 [file s1]

figure S1: ROC curve analysis for differential expression of investigated network panel between T2DM and control

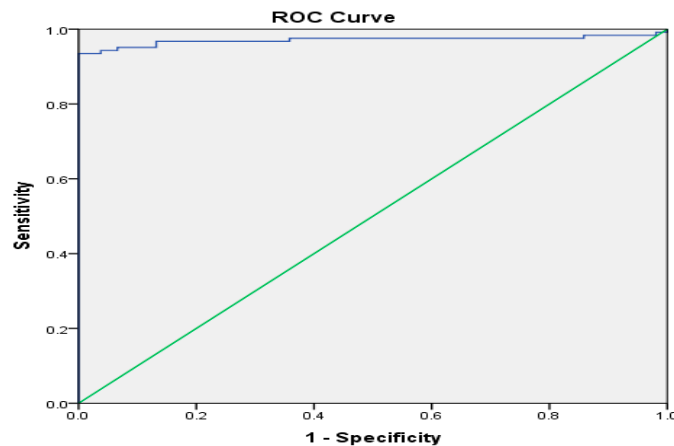

ROC curve of *RP11-773H22.4 lncRNA* (AUC: 0.971, 95% CI: 0.944-0.998,  $P < 0.01$ ).

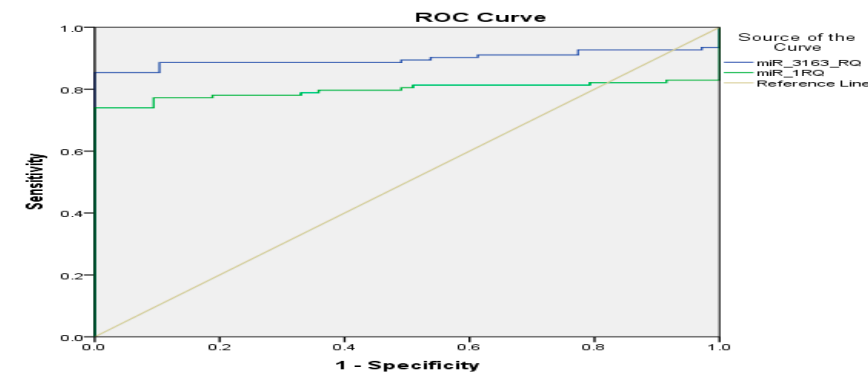

ROC curve of *miR-3163 miRNA* (AUC: 0.898, 95% CI: 0.848-0.948,  $P < 0.01$ ). and *mir-1* (AUC: 0.797, 95% CI: 0.729-0.865,  $P < 0.01$ )

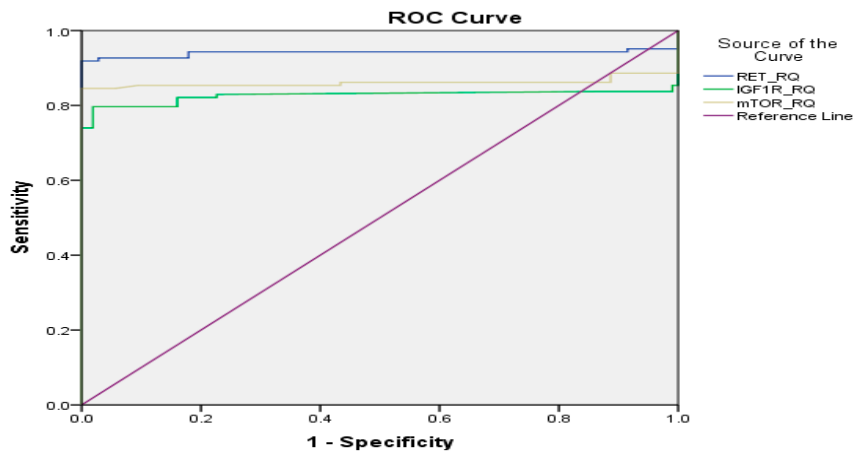

ROC curve for *RET mRNA* (AUC: 0.941, 95% CI: 0.900-0.981,  $P < 0.01$ ), *IGF1-R* (AUC: 0.826, 95% CI: 0.761-0.892,  $P < 0.01$ ) and *m-TOR* (AUC : 0.860, 95% CI: 0.800-0.920,  $P < 0.01$ ).

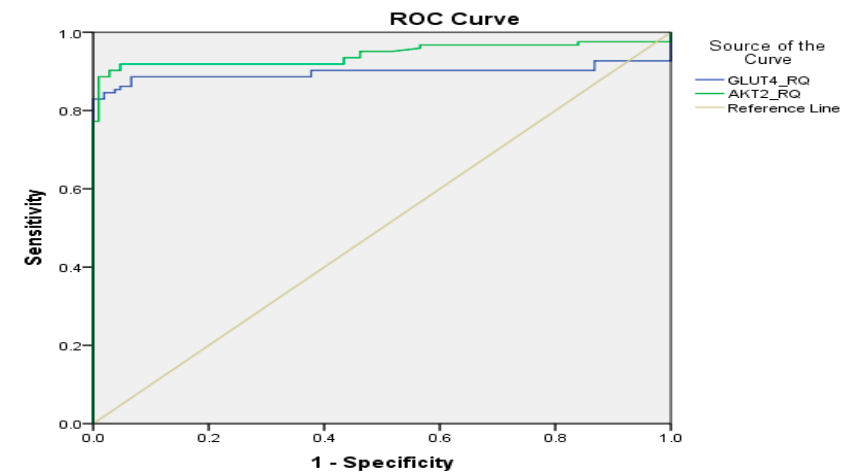

ROC curve for *GLUT4 mRNA* (AUC: 0.897, (95% CI: 0.846-0.948,  $P < 0.01$ ), *AKT-2* (AUC: 0.943, 95% CI: 0.908-0.978,  $P < 0.01$ ).

**Table S1:** Comparison between lymphocytes' count and viability among the 3 investigated cell line groups:

| Dependent Variable        | (I) Cell Lines                        | (J) Cell Lines                        | Mean Difference (I-J) | Std. Error | Sig.       | 95% Confidence Interval |             |
|---------------------------|---------------------------------------|---------------------------------------|-----------------------|------------|------------|-------------------------|-------------|
|                           |                                       |                                       |                       |            |            | Lower Bound             | Upper Bound |
| Lymphocytes Count (x10*4) | T2DM lymphocytes without Cas9 editing | T2DM lymphocytes with Cas9 editing    | 5.000                 | 2.735      | NS<br>.117 | -1.69                   | 11.69       |
|                           |                                       | Healthy Control lymphocytes           | -6.667                | 2.735      | .051       | -13.36                  | .03         |
|                           | T2DM lymphocytes with Cas9 editing    | T2DM lymphocytes without Cas9 editing | -5.000                | 2.735      | NS<br>.117 | -11.69                  | 1.69        |
|                           |                                       | Healthy Control lymphocytes           | -11.667*              | 2.735      | .005**     | -18.36                  | -4.97       |

|                           |                                       |                                       |          |       |        |        |        |
|---------------------------|---------------------------------------|---------------------------------------|----------|-------|--------|--------|--------|
|                           | Healthy Control lymphocytes           | T2DM lymphocytes without Cas9 editing | 6.667    | 2.735 | .051   | -.03   | 13.36  |
|                           |                                       | T2DM lymphocytes with Cas9 editing    | 11.667*  | 2.735 | .005** | 4.97   | 18.36  |
| Lymphocytes Viability (%) | T2DM lymphocytes without Cas9 editing | T2DM lymphocytes with Cas9 editing    | 1.5000   | .6242 | .053   | -.027  | 3.027  |
|                           |                                       | Healthy Control lymphocytes           | -1.6333* | .6242 | .040*  | -3.161 | -.106  |
|                           | T2DM lymphocytes with Cas9 editing    | T2DM lymphocytes without Cas9 editing | -1.5000  | .6242 | .053   | -3.027 | .027   |
|                           |                                       | Healthy Control lymphocytes           | -3.1333* | .6242 | .002** | -4.661 | -1.606 |
|                           | Healthy Control lymphocytes           | T2DM lymphocytes without Cas9 editing | 1.6333*  | .6242 | .040*  | .106   | 3.161  |
|                           |                                       | T2DM lymphocytes with Cas9 editing    | 3.1333*  | .6242 | .002** | 1.606  | 4.661  |

One-way ANOVA, Post Hoc test, p: NS, not significant (>0.05), \*\*p < 0.01: is highly significant, \*p<0.05: is significant.

figure S2(a): Expression of *RET mRNA* in insulin resistance and T2DM in Gene Atlas Database. Snapshot shows the expression of *RET* gene in T2DM (*available at <https://www.ebi.ac.uk>*) accessed on 9<sup>th</sup> of June 2017.

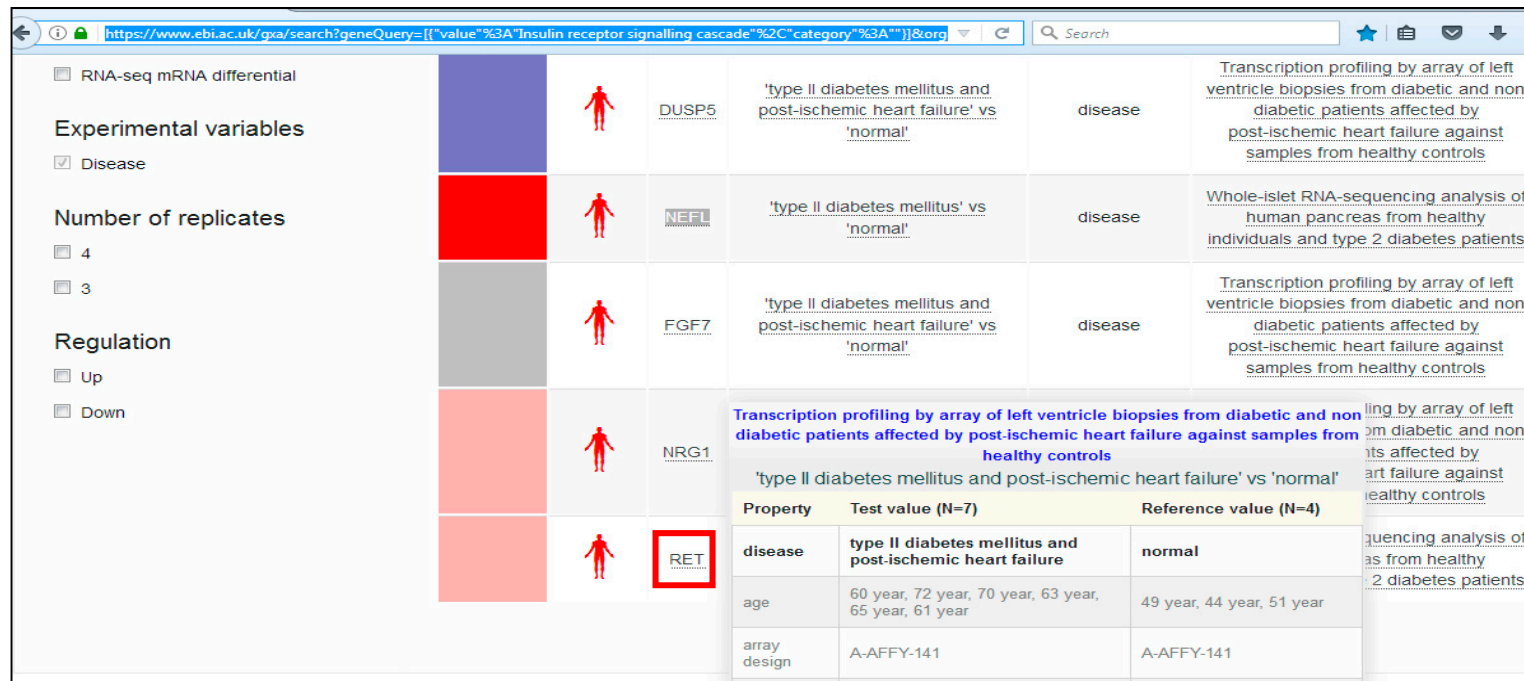

figure S2(b): Differential expression of *RET* mRNA in normal adipose and skeletal muscle in Protein Atlas Database . Snapshot shows the expression of *RET* mRNA in normal skeletal muscle and adipose tissue (available at <https://www.proteinatlas.org/>) accessed on 6th of September 2017.

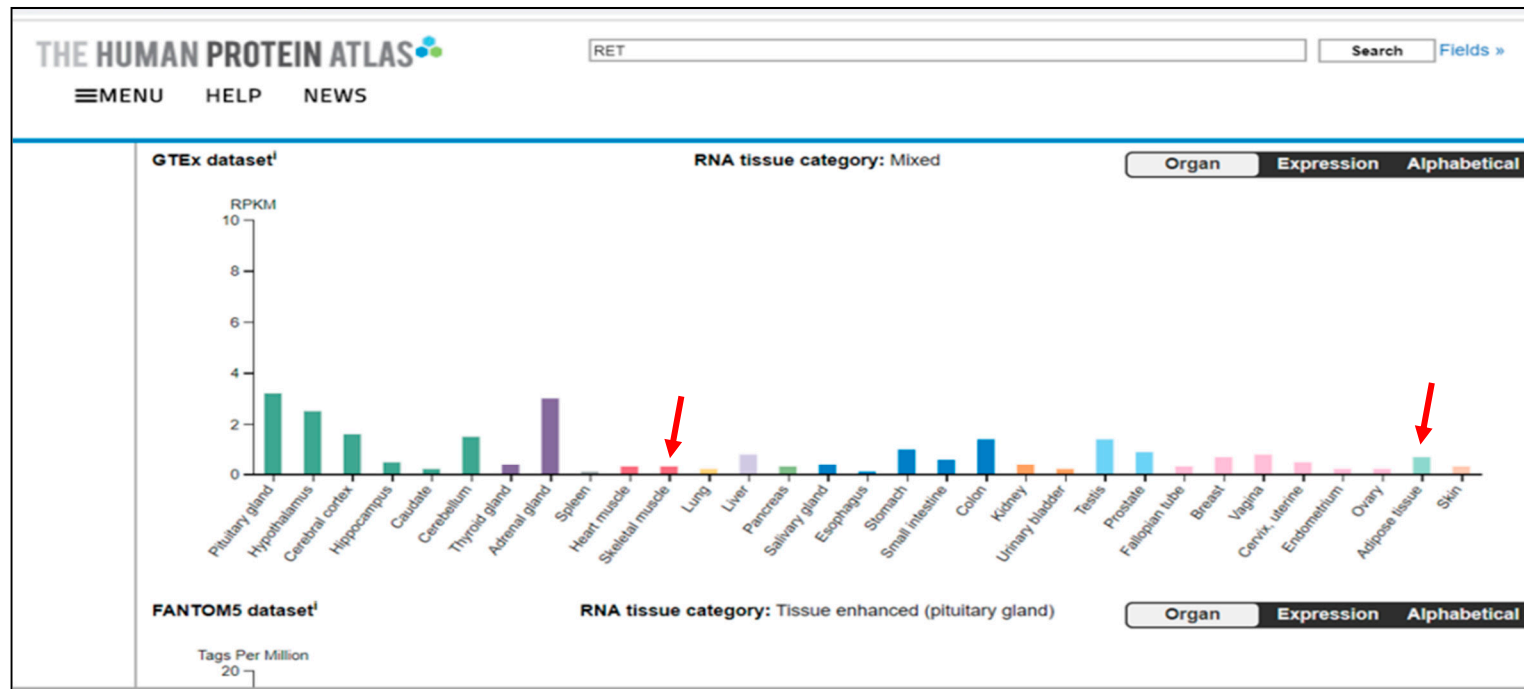

figure S2(c): Verification of expression of *RET* mRNA in normal skeletal muscle, adipose tissue and in WBCs. Snapshot shows the verification of expression of *RET* mRNA in normal skeletal muscle and adipose tissue and in WBCs (*available at <https://www.genecards.org/>*)

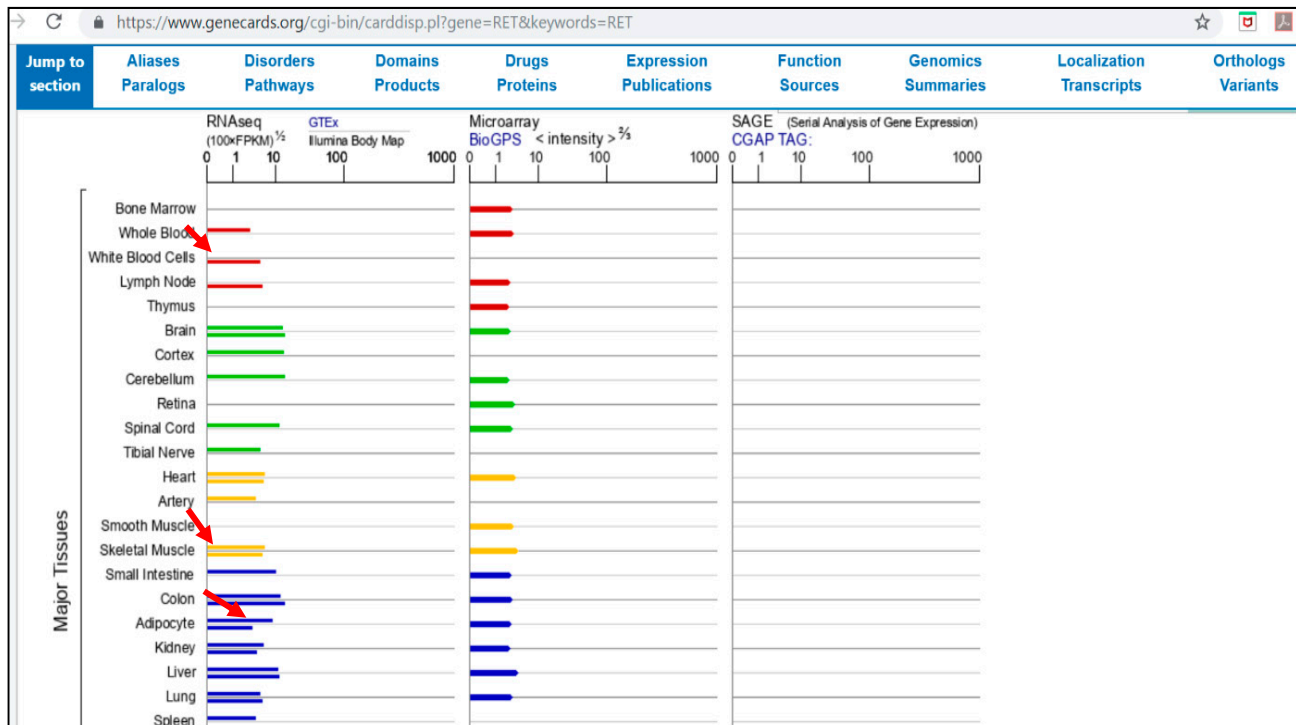

figure S2(d): Expression of *mTOR* mRNA in insulin resistance and T2DM in Gene Atlas Database (figure 4s). Snapshot shows the expression of *mTOR* gene in IR (*available at <https://www.ebi.ac.uk>*)

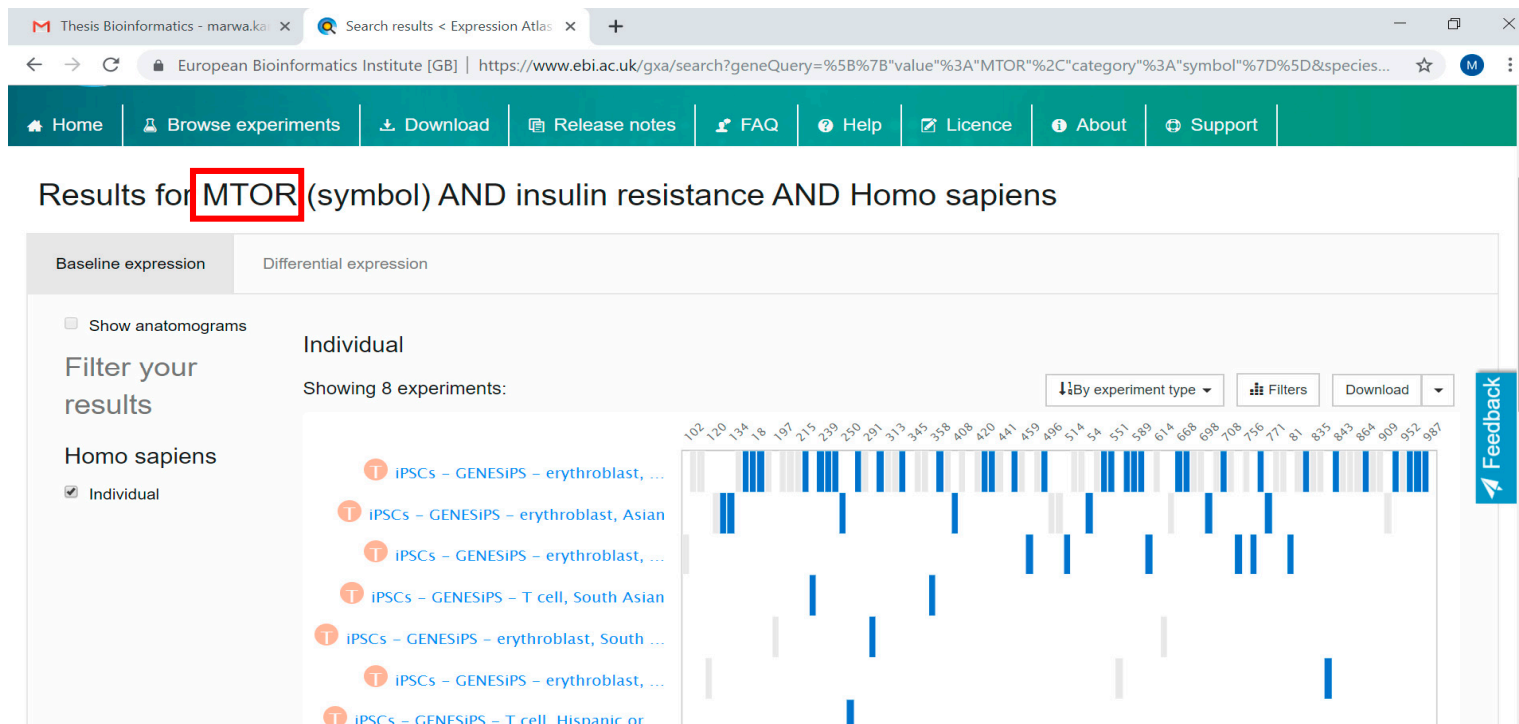

figure S2(e): k map and string map show involvement of *mTOR* gene in insulin signaling pathway and its relation to *RET* gene in insulin resistance in T2DM. Snapshot verifying that the identified *mTOR* gene is linked to IR in T2DM (*available at <http://www.kegg.jp/>*)

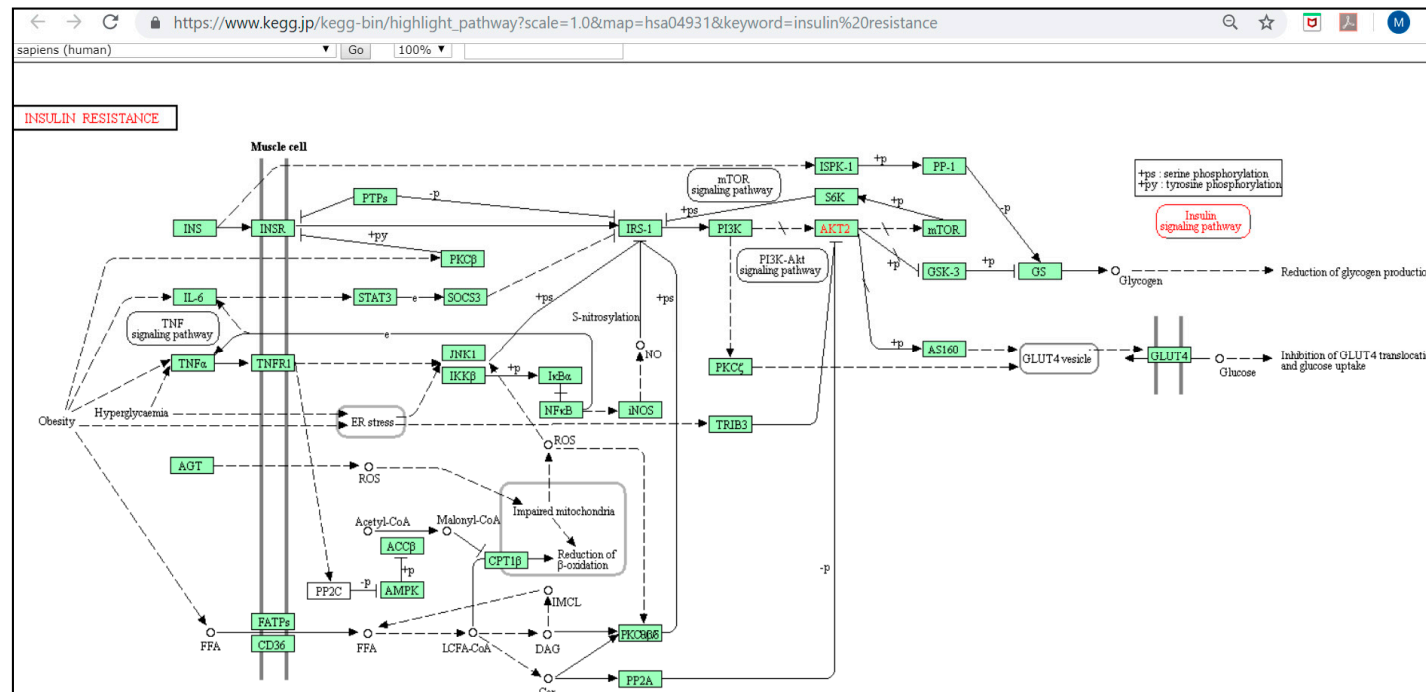



figure S2(f): Snapshot shows verification of the identified candidate genes interaction in the pathogenesis of IR in T2DM (available at: <http://string-db.org/>)

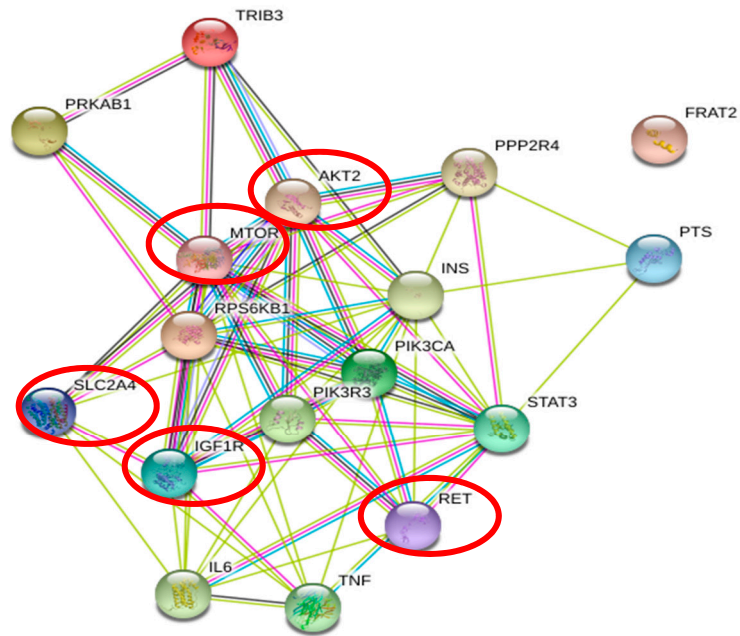

figure S2(g): Retrieval of long non-coding RNA *LncRNA-RP11-773H22.4* and the associated miRNAs: *miR-3163* & *miR-1* that acting as ceRNAs for *RET* mRNA through Database of LncRNA acting as competing endogenous. Snapshot shows search for *LncRNA-RP11-773H22.4*(ENSG00000266969) and *miR-3163* miRNA (available at <http://gyanxet-beta.com/lncdb/index.php>) accessed on 18th of July 2017.

| HOME BROWSE DOWNLOAD FAQ CONTACT US FEEDBACK                                                                                                                                                                                                                                                                                                                                                                  |                                   |                           |                         |             |                |                                            |
|---------------------------------------------------------------------------------------------------------------------------------------------------------------------------------------------------------------------------------------------------------------------------------------------------------------------------------------------------------------------------------------------------------------|-----------------------------------|---------------------------|-------------------------|-------------|----------------|--------------------------------------------|
| Resulting ceRNAs for the mRNA <b>NM_020975(RET)</b>                                                                                                                                                                                                                                                                                                                                                           |                                   |                           |                         |             |                |                                            |
| The ceRNAs are sorted according to the number of shared miRNAs. The ceRNA score (calculated from the ratio of shared MREs with the total number of regulating MREs) gives the likelihood of the pair for being ceRNAs. Click the serial number of any entry to view the expression heatmap of the lncRNA-mRNA pair. Click the lncRNA or mRNA transcript id to view all miRNA target sites of that transcript. |                                   |                           |                         |             |                |                                            |
| Showing results 1 to 30 of 654                                                                                                                                                                                                                                                                                                                                                                                |                                   |                           |                         |             |                |                                            |
| Page 1 of 22                                                                                                                                                                                                                                                                                                                                                                                                  |                                   |                           |                         |             |                |                                            |
| Serial no.                                                                                                                                                                                                                                                                                                                                                                                                    | lncRNA transcript_id              | mRNA Accession            | Number of common miRNAs | ceRNA score | P-value        | common miRNAs                              |
| 1                                                                                                                                                                                                                                                                                                                                                                                                             | <a href="#">ENST0000058585.1</a>  | <a href="#">NM_020975</a> | 3                       | 0.375       | 0.301066871362 | hsa-miR-128, hsa-miR-3163, hsa-miR-885-5p. |
| 2                                                                                                                                                                                                                                                                                                                                                                                                             | <a href="#">ENST00000586787.1</a> | <a href="#">NM_020975</a> | 3                       | 0.375       | 0.197570199090 | hsa-miR-128, hsa-miR-4312, hsa-miR-885-5p. |
| 3                                                                                                                                                                                                                                                                                                                                                                                                             | <a href="#">ENST00000549854.2</a> | <a href="#">NM_020975</a> | 3                       | 0.375       | 0.606013058817 | hsa-miR-128, hsa-miR-3163, hsa-miR-885-5p. |
| 4                                                                                                                                                                                                                                                                                                                                                                                                             | <a href="#">ENST00000584772.1</a> | <a href="#">NM_020975</a> | 3                       | 0.375       | 0.311418832516 | hsa-miR-128, hsa-miR-3163, hsa-miR-885-5p. |
| 5                                                                                                                                                                                                                                                                                                                                                                                                             | <a href="#">ENST00000577287.1</a> | <a href="#">NM_020975</a> | 3                       | 0.375       | 0.334425541818 | hsa-miR-128, hsa-miR-3163, hsa-miR-885-5p. |
| 6                                                                                                                                                                                                                                                                                                                                                                                                             | <a href="#">ENST00000429988.2</a> | <a href="#">NM_020975</a> | 3                       | 0.375       | 0.576246393802 | hsa-miR-128, hsa-miR-3163, hsa-miR-885-5p. |
| 7                                                                                                                                                                                                                                                                                                                                                                                                             | <a href="#">ENST00000583712.1</a> | <a href="#">NM_020975</a> | 3                       | 0.375       | 0.079405444990 | hsa-miR-128, hsa-miR-3163, hsa-miR-4312.   |

| HOME BROWSE DOWNLOAD FAQ CONTACT US FEEDBACK |                                          |                           |   |       |                |                      |
|----------------------------------------------|------------------------------------------|---------------------------|---|-------|----------------|----------------------|
| 636                                          | <a href="#">ENST00000580022.1</a>        | <a href="#">NM_020975</a> | 1 | 0.125 | 0.742223270147 | hsa-miR-3163.        |
| 637                                          | <a href="#">ENST00000581080.1</a>        | <a href="#">NM_020975</a> | 1 | 0.125 | 0.635840286825 | hsa-miR-3163.        |
| 638                                          | <a href="#">ENST00000581719.1</a>        | <a href="#">NM_020975</a> | 1 | 0.125 | 0.854628916757 | hsa-miR-3163.        |
| 639                                          | <b><a href="#">ENST00000582527.1</a></b> | <a href="#">NM_020975</a> | 1 | 0.125 | 0.883395048378 | <b>hsa-miR-3163.</b> |
| 640                                          | <a href="#">ENST00000583138.1</a>        | <a href="#">NM_020975</a> | 1 | 0.125 | 0.331510826388 | hsa-miR-3163.        |
| 641                                          | <a href="#">ENST00000584382.1</a>        | <a href="#">NM_020975</a> | 1 | 0.125 | 0.894852455022 | hsa-miR-3163.        |
| 642                                          | <a href="#">ENST00000584805.1</a>        | <a href="#">NM_020975</a> | 1 | 0.125 | 0.908090519951 | hsa-miR-3163.        |
| 643                                          | <a href="#">ENST00000585381.1</a>        | <a href="#">NM_020975</a> | 1 | 0.125 | 0.429288963975 | hsa-miR-3163.        |
| 644                                          | <a href="#">ENST00000586053.1</a>        | <a href="#">NM_020975</a> | 1 | 0.125 | 0.514542529301 | hsa-miR-3163.        |
| 645                                          | <a href="#">ENST00000586727.1</a>        | <a href="#">NM_020975</a> | 1 | 0.125 | 0.465318880983 | hsa-miR-3163.        |
| 646                                          | <a href="#">ENST00000587344.1</a>        | <a href="#">NM_020975</a> | 1 | 0.125 | 0.92550339304  | hsa-miR-3163.        |
| 647                                          | <b><a href="#">ENST00000588211.1</a></b> | <a href="#">NM_020975</a> | 1 | 0.125 | 0.265688769353 | hsa-miR-3163.        |
| 648                                          | <a href="#">ENST00000588900.1</a>        | <a href="#">NM_020975</a> | 1 | 0.125 | 0.488074106037 | hsa-miR-3163.        |
| 649                                          | <a href="#">ENST00000589040.1</a>        | <a href="#">NM_020975</a> | 1 | 0.125 | 0.464411816257 | hsa-miR-3163.        |
| 650                                          | <a href="#">ENST00000590739.1</a>        | <a href="#">NM_020975</a> | 1 | 0.125 | 0.482244262612 | hsa-miR-3163.        |
| 651                                          | <a href="#">ENST00000591368.1</a>        | <a href="#">NM_020975</a> | 1 | 0.125 | 0.548582114311 | hsa-miR-3163.        |
| 652                                          | <a href="#">ENST00000594810.1</a>        | <a href="#">NM_020975</a> | 1 | 0.125 | 0.417233159017 | hsa-miR-3163.        |

figure S2(h): Snapshot shows identification of *miR-1* miRNA related to *LncRNA-RP11-773H22.4* in T2DM (available at <http://gyanxet-beta.com/lncedb/index.php>) accessed on 18<sup>th</sup> of July 2017.

| <a href="#">HOME</a> <a href="#">BROWSE</a> <a href="#">DOWNLOAD</a> <a href="#">FAQ</a> <a href="#">CONTACT US</a> <a href="#">FEEDBACK</a> |                 |                   |                        |                 |                                      |
|----------------------------------------------------------------------------------------------------------------------------------------------|-----------------|-------------------|------------------------|-----------------|--------------------------------------|
| miRNA targets on lncRNA <b>RP11-773H22.4</b> (ENST00000588211.1)                                                                             |                 |                   |                        |                 |                                      |
| Showing results 1 to 30 of 88                                                                                                                |                 |                   |                        |                 |                                      |
| Serial no.                                                                                                                                   | miRNA Name      | Target            | Number of target sites | miRNA seed type | Predicted from Ago interaction sites |
| 1                                                                                                                                            | hsa-miR-1       | ENST00000588211.1 | 1                      | 6-mer,          | no                                   |
| 2                                                                                                                                            | hsa-miR-101-5p  | ENST00000588211.1 | 1                      | 6-mer,          | no                                   |
| 3                                                                                                                                            | hsa-miR-1193    | ENST00000588211.1 | 1                      | 7-merm8,        | no                                   |
| 4                                                                                                                                            | hsa-miR-1224-5p | ENST00000588211.1 | 1                      | 7-merA1,        | no                                   |
| 5                                                                                                                                            | hsa-miR-1234-3p | ENST00000588211.1 | 1                      | 6-mer,          | no                                   |
| 6                                                                                                                                            | hsa-miR-1290    | ENST00000588211.1 | 1                      | 6-mer,          | no                                   |
| 7                                                                                                                                            | hsa-miR-1292-5p | ENST00000588211.1 | 1                      | 7-merm8,        | no                                   |
| 8                                                                                                                                            | hsa-miR-1299    | ENST00000588211.1 | 1                      | 7-merm8,        | no                                   |
| 9                                                                                                                                            | hsa-miR-145-5p  | ENST00000588211.1 | 1                      | 8-mer,          | no                                   |

figure S2(i): Verification of *miR-3136* and *miR-1* *miRNAs* that act as epigenetic regulators for *RET* and *mTOR mRNAs* in IR in T2DM. Snapshot shows identification of *m-TOR mRNA* related to *miR-3163miRNA* in IR and in T2DM (available at <http://mirwalk.umm.uni-heidelberg.de/>) accessed on 23<sup>rd</sup> of December 2017.

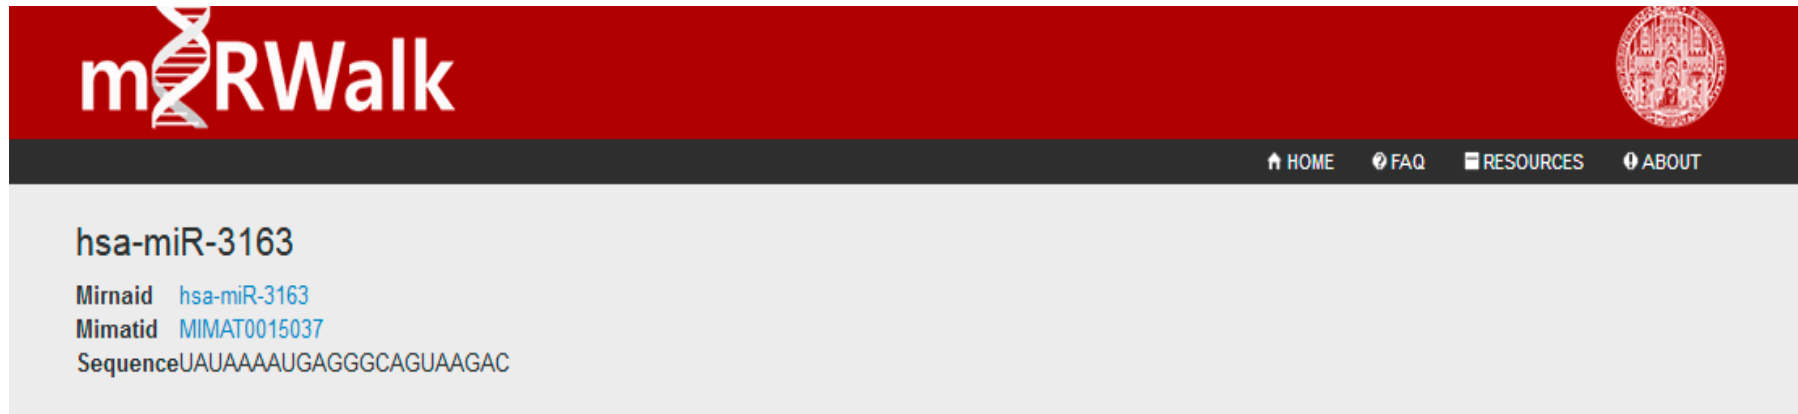

**hsa-miR-3163**

Mirnaid [hsa-miR-3163](#)  
Mimatid [MIMAT0015037](#)  
Sequence [UAUAAAUGAGGGCAGUAAGAC](#)

Interactions:

| Mirna                        | Ensemblid                       | Genesymbol              | Score | Position | Binding Site | Au   | Me      | N Pairings | Targetscan | Mirdb | Mirtarbase |
|------------------------------|---------------------------------|-------------------------|-------|----------|--------------|------|---------|------------|------------|-------|------------|
| <a href="#">hsa-miR-3163</a> | <a href="#">ENST00000270776</a> | <a href="#">PGD</a>     | 0.92  | CDS      | 1390,1408    | 0.47 | -19.424 | 14         | —          | —     | —          |
| <a href="#">hsa-miR-3163</a> | <a href="#">ENST00000377036</a> | <a href="#">DFFA</a>    | 0.92  | 3UTR     | 2141,2154    | 0.53 | -16.49  | 12         | —          | —     | —          |
| <a href="#">hsa-miR-3163</a> | <a href="#">ENST00000377022</a> | <a href="#">CASZ1</a>   | 0.92  | CDS      | 2963,3003    | 0.34 | -17.11  | 10         | —          | —     | —          |
| <a href="#">hsa-miR-3163</a> | <a href="#">ENST00000344008</a> | <a href="#">CASZ1</a>   | 0.92  | CDS      | 2963,3003    | 0.34 | -17.11  | 10         | —          | —     | —          |
| <a href="#">hsa-miR-3163</a> | <a href="#">ENST00000376936</a> | <a href="#">EXOSC10</a> | 1.00  | CDS      | 2136,2174    | 0.48 | -17.11  | 13         | —          | —     | —          |
| <a href="#">hsa-miR-3163</a> | <a href="#">ENST00000361445</a> | <a href="#">MTOR</a>    | 1.00  | CDS      | 1664,1674    | 0.37 | -17.11  | 9          | —          | —     | —          |
| <a href="#">hsa-miR-3163</a> | <a href="#">ENST00000361445</a> | <a href="#">MTOR</a>    | 0.92  | CDS      | 1331,1344    | 0.47 | -17.11  | 12         | —          | —     | —          |
| <a href="#">hsa-miR-3163</a> | <a href="#">ENST00000294484</a> | <a href="#">DISP3</a>   | 0.92  | CDS      | 1555,1569    | 0.43 | -16.623 | 12         | —          | —     | —          |
| <a href="#">hsa-miR-3163</a> | <a href="#">ENST00000376770</a> | <a href="#">FBXO44</a>  | 1.00  | 5UTR     | 323,347      | 0.48 | -6.515  | 13         | —          | —     | —          |
| <a href="#">hsa-miR-3163</a> | <a href="#">ENST00000376768</a> | <a href="#">FBXO44</a>  | 0.92  | 3UTR     | 1457,1474    | 0.35 | -17.11  | 10         | —          | —     | —          |
| <a href="#">hsa-miR-3163</a> | <a href="#">ENST00000376590</a> | <a href="#">MTHFR</a>   | 0.85  | 3UTR     | 2922,2935    | 0.43 | -14.908 | 12         | —          | —     | —          |
| <a href="#">hsa-miR-3163</a> | <a href="#">ENST00000376590</a> | <a href="#">MTHFR</a>   | 0.85  | CDS      | 616,628      | 0.35 | -19.935 | 10         | —          | —     | —          |

figure S2(j): Verification of expression of *LncRNA-RP11-773H22.4* in normal skeletal muscle, adipose tissue and in WBCs. Snapshot shows the verification of expression of *LncRNA-RP11-773H22.4* or ENSG00000266969 in normal skeletal muscle, adipose tissue and in WBCs (available at <http://www.noncode.org/>)

Isoforms

| Transcript ID |
|---------------|
|---------------|

Data Sources

| Source Name  | Old Id             |
|--------------|--------------------|
| PMID26117828 | PNCT_HSA052403     |
| NAME         | RP11-773H22.4      |
| ensembl      | ENST00000588211    |
| PMID26117828 | TCONS_00018126     |
| gencode      | ENST00000588211.1  |
| NONCODEv4    | NONHSAT058407      |
| Incipedia    | lnc-PTPN2-6-1_dup1 |

figure S2(k): Verification of expression of *miR-3163* miRNA in normal skeletal muscle and adipose tissue.

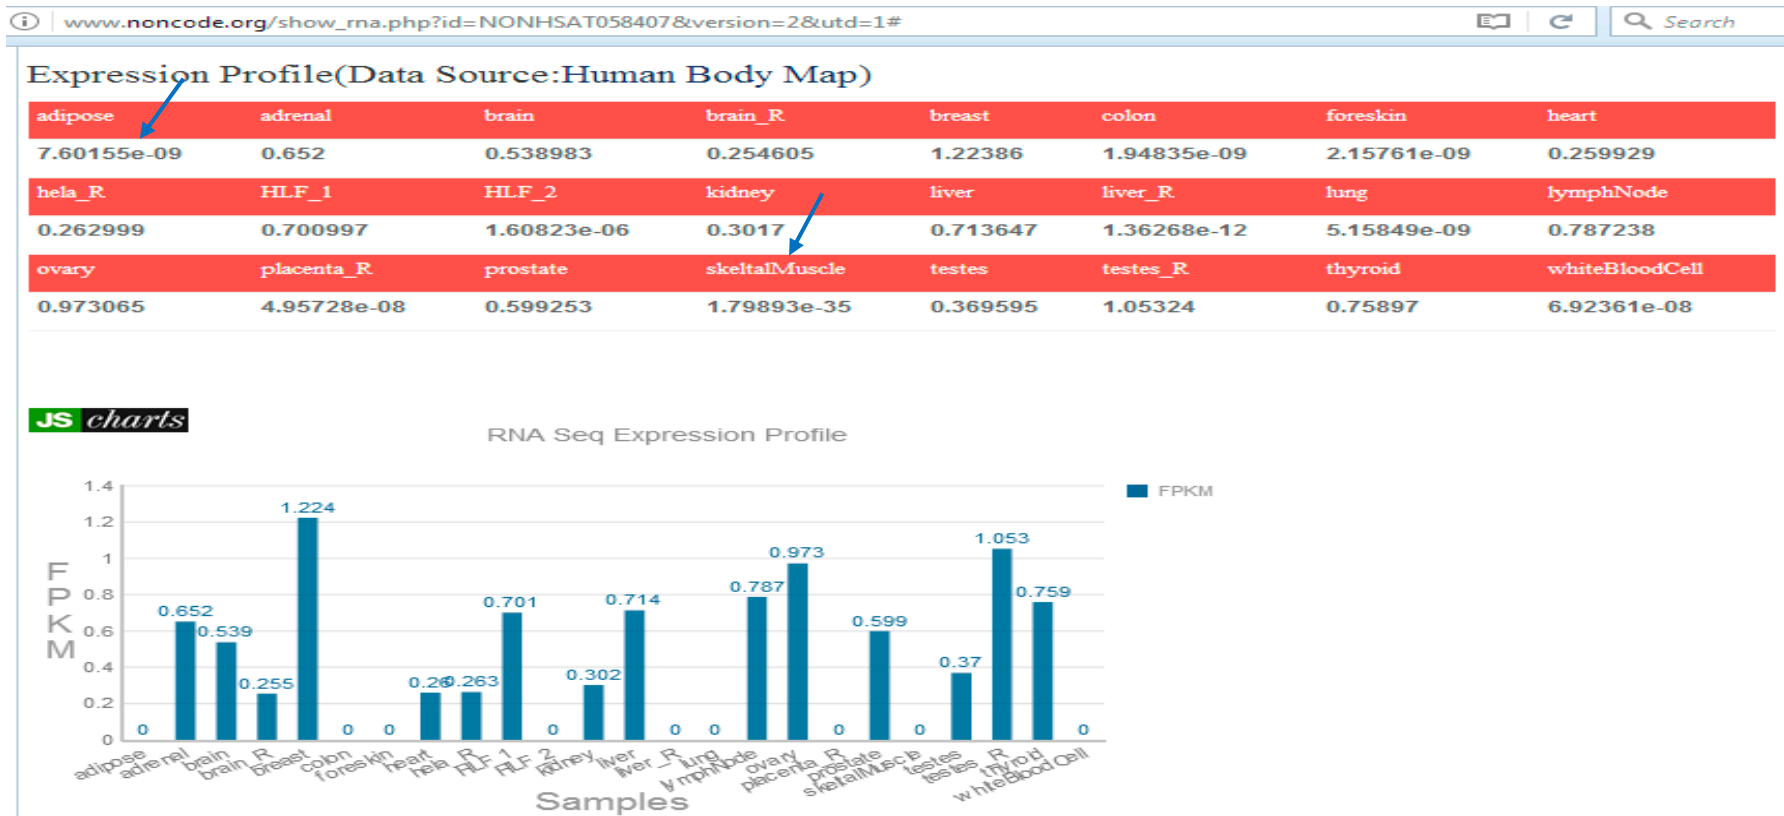

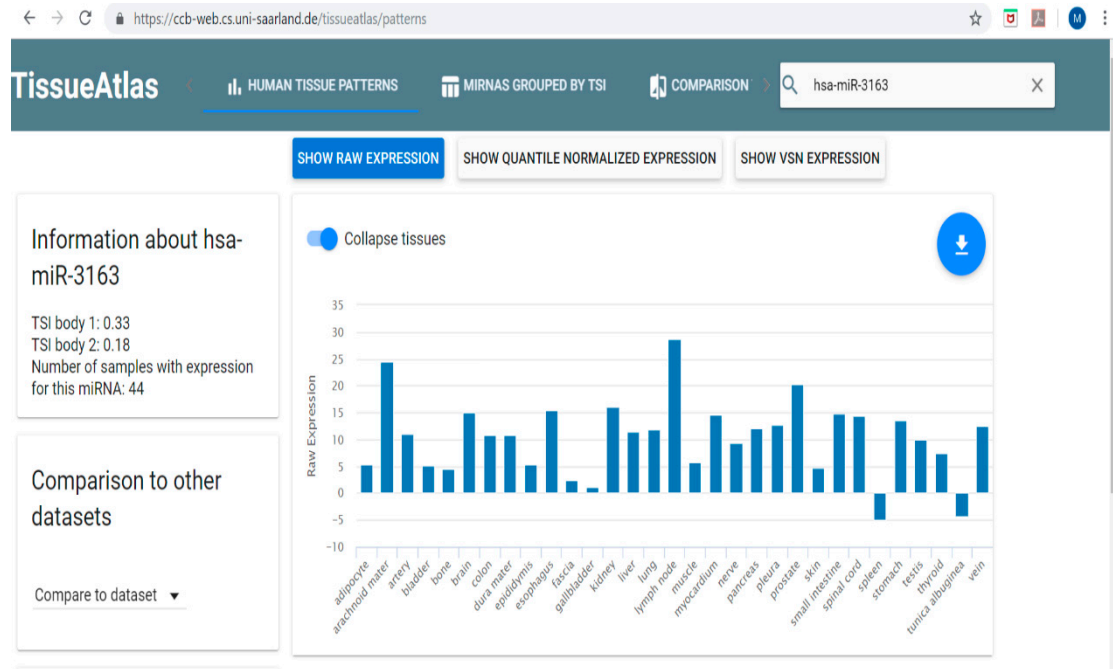

figure S2(l): Alignment between *LncRNA-RP11-773H22.4* and *miR-3163 miRNA* (available at <https://www.ebi.ac.uk>)

|                                                                                                                                                                                                                                                                                       |                                                        |              |                      |
|---------------------------------------------------------------------------------------------------------------------------------------------------------------------------------------------------------------------------------------------------------------------------------------|--------------------------------------------------------|--------------|----------------------|
| <div><div>← → ↺ 🏠</div><div>🔒 <a href="https://www.ebi.ac.uk/Tools/services/web/toolresult.ebi?jobId=eml">https://www.ebi.ac.uk/Tools/services/web/toolresult.ebi?jobId=eml</a> <div>📄 🗨️ ⭐ 🔍 Search</div></div><div><div>Download 📄 🗨️ ⭐</div><div>Feedback rShare</div></div></div> |                                                        |              |                      |
| Protein alignment                                                                                                                                                                                                                                                                     | Nucleotide alignment                                   | Web services | Help & Documentation |
| EMBOSS_001                                                                                                                                                                                                                                                                            | 1 TTIGAAGCGAGGAAGCCGCGCCCTGCGAGTCCGAGGAGGAAATGGAG      | 50           |                      |
| EMBOSS_001                                                                                                                                                                                                                                                                            | 1 -----                                                | 0            |                      |
| EMBOSS_001                                                                                                                                                                                                                                                                            | 51 CTCTGCGCTGCGTGGGACCCGSGGGACGGCTCCCGITGGCGCCGCTTCA   | 100          |                      |
| EMBOSS_001                                                                                                                                                                                                                                                                            | 1 -----                                                | 0            |                      |
| EMBOSS_001                                                                                                                                                                                                                                                                            | 101 AGGTAAGGGATTAAGAGGCCGAGAGAGATATCGTCTGCGAGGGTGAGGAT | 150          |                      |
| EMBOSS_001                                                                                                                                                                                                                                                                            | 1 -----                                                | 0            |                      |
| EMBOSS_001                                                                                                                                                                                                                                                                            | 151 ACTGAGGTTGGCAGTGTCAACATCGCAAGAGTGCCTACCAgaggagga   | 200          |                      |
| EMBOSS_001                                                                                                                                                                                                                                                                            | 1 -----                                                | 0            |                      |
| EMBOSS_001                                                                                                                                                                                                                                                                            | 201 ggaggaggaggaaggagCTGGGCATAACTGGACCATCTCGATCCAGCCCG | 250          |                      |
| EMBOSS_001                                                                                                                                                                                                                                                                            | 1 -----                                                | 0            |                      |
| EMBOSS_001                                                                                                                                                                                                                                                                            | 251 TGGGGAATCCAGAGGGGATAACAAGAGGATA-TAACCACAGGACAATTCA | 299          |                      |
| EMBOSS_001                                                                                                                                                                                                                                                                            | 1 -----UAUAAAUGAGGGCAGUAA-----GAC-----                 | 22           |                      |
| EMBOSS_001                                                                                                                                                                                                                                                                            | 300 TTAGGCTGTGTTTGGAGTTTCCTGAATTCTATTCCAAATTATTACAAA   | 349          |                      |
| EMBOSS_001                                                                                                                                                                                                                                                                            | 23 -----                                               | 22           |                      |
| EMBOSS_001                                                                                                                                                                                                                                                                            | 350 GGCATATTAAAATAATTTTATCTTACAAATTCACATATTTAAAATTGAA  | 399          |                      |
| EMBOSS_001                                                                                                                                                                                                                                                                            | 23 -----                                               | 22           |                      |
| EMBOSS_001                                                                                                                                                                                                                                                                            | 400 CATGGAACAGACTCTAGATGACATCAAATATTCCTTATTATGATATACA  | 449          |                      |
| EMBOSS_001                                                                                                                                                                                                                                                                            | 23 -----                                               | 22           |                      |
| EMBOSS_001                                                                                                                                                                                                                                                                            | 450 AGAATGTAACATATGCTAAATATTC                          | 474          |                      |



figure S2(m): Snapshot shows alignment of *miR-1* *miRNA* with *LncRNA-RP11-773H22.4*  
(available at <https://www.ebi.ac.uk>) accessed on 11<sup>th</sup> April 2019.

| Protein alignment | Nucleotide alignment                                                                                      | Web services | Help & Documentation | Bioinformatics Tools FAQ | Feedback | Share |
|-------------------|-----------------------------------------------------------------------------------------------------------|--------------|----------------------|--------------------------|----------|-------|
| EMBOSS_001        | 101 AGGTAAGGGATTAAAGAGCCGAGAGAGATATCGTCTGCGAGGGTGAGGAT                                                    | 150          |                      |                          |          |       |
| EMBOSS_001        | 1 -----                                                                                                   | 0            |                      |                          |          |       |
| EMBOSS_001        | 151 ACTGGAGGTTGGCAGTGTACGATCGCAAGAGTGCTCTACAgaggagga                                                      | 200          |                      |                          |          |       |
| EMBOSS_001        | 1 -----                                                                                                   | 0            |                      |                          |          |       |
| EMBOSS_001        | 201 ggaggaggaggaaggagCTGGGCATAACTGGACCATCTCGATCCAGCCCG                                                    | 250          |                      |                          |          |       |
| EMBOSS_001        | 1 -----                                                                                                   | 0            |                      |                          |          |       |
| EMBOSS_001        | 251 TGGGGAATCCAGAGGGGATAACAAGAGGATATAACCACAGGACAATTTCAT                                                   | 300          |                      |                          |          |       |
| EMBOSS_001        | 1 -----                                                                                                   | 0            |                      |                          |          |       |
| EMBOSS_001        | 301 TAGGCTGTGTTTGACGTTTCTGAATTCTATTCCAATTATTCACAAAG                                                       | 350          |                      |                          |          |       |
| EMBOSS_001        | 1 -----UG---                                                                                              | 2            |                      |                          |          |       |
| EMBOSS_001        | 351 GCATATTAATAATTTTATCTTACAAATTCACATATTTAAATTTGAAC                                                       | 400          |                      |                          |          |       |
| EMBOSS_001        | 3 --GGAAACAUAUCUUAUAUAGCC--CAUAUAGGACCUGCUAAGCUAUG-<br>       ::: ::   ::: :: ::: ::: ::: ::: ::: ::: ::: | 47           |                      |                          |          |       |
| EMBOSS_001        | 401 ATGGAAACAGA---CTCTAGATGACATCAAAATATTCCTTAT---TATGA                                                    | 443          |                      |                          |          |       |
| EMBOSS_001        | 48 -----GAUUGUAA-AGAAGUAUG----UAUUCUA<br>   :: :: ::: ::: ::: ::: ::: ::: :::                             | 71           |                      |                          |          |       |
| EMBOSS_001        | 444 TATACAAGAAATGTAACA----TATGCTAAATAT-TC-                                                                | 474          |                      |                          |          |       |

figure S2(n): Alignment between *mTOR mRNA miR-3163* (available at <https://www.ebi.ac.uk>)

← → ↺ European Bioinformatics Institute [GB] | [https://www.ebi.ac.uk/Tools/services/web/toolresult.ebi?jobId=emboss\\_needle-I20190707-113825-0229-36509602-p2m](https://www.ebi.ac.uk/Tools/services/web/toolresult.ebi?jobId=emboss_needle-I20190707-113825-0229-36509602-p2m) ☆ M ⋮

| Input form | Web services | Help & Documentation                                | Bioinformatics Tools FAQ | Feedback | Share |
|------------|--------------|-----------------------------------------------------|--------------------------|----------|-------|
| EMBOSS_001 | 301          | tactcgcttcctatgaccaactgaaccatcacatttttgaattgggttcca | 350                      |          |       |
| EMBOSS_001 | 1            | -----                                               | 0                        |          |       |
| EMBOSS_001 | 351          | gctcagatgccaatgagaggaaagggtgcatcttggccatagctagcctc  | 400                      |          |       |
| EMBOSS_001 | 1            | -----                                               | 0                        |          |       |
| EMBOSS_001 | 401          | ataggagtgggaagtggaatgccaccgaattggcagatttgccaacta    | 450                      |          |       |
| EMBOSS_001 | 1            | -----                                               | 0                        |          |       |
| EMBOSS_001 | 451          | tcttcggaacctctccctccaatgaccagttgtcatggaatggcat      | 500                      |          |       |
| EMBOSS_001 | 1            | -----                                               | 0                        |          |       |
| EMBOSS_001 | 501          | ccaaggccattggcgtcttggcatggcaggggacattttaccgtgag     | 550                      |          |       |
| EMBOSS_001 | 1            | -----UAAUA                                          | 4                        |          |       |
| EMBOSS_001 | 551          | tacgtggaatttgaggtgaagcgagccctggaatggctgggtgctgaccg  | 600                      |          |       |
| EMBOSS_001 | 5            | AAAUAGAGGCGAGUAAGAC-----                            | 22                       |          |       |
| EMBOSS_001 | 601          | caatgagggtcg-gagacatgagctgtcctggttctcctgagctggcc    | 649                      |          |       |
| EMBOSS_001 | 23           | -----                                               | 22                       |          |       |
| EMBOSS_001 | 650          | atcagcgtccctaccttcttcttccagcaagtgaacccttctttgacaa   | 699                      |          |       |
| EMBOSS_001 | 23           | -----                                               | 22                       |          |       |
| EMBOSS_001 | 700          | catttttggcgtgtgggaccccaacaggccatccgtgaggagctg       | 749                      |          |       |
| EMBOSS_001 | 23           | -----                                               | 22                       |          |       |
| EMBOSS_001 | 750          | tagccgcccttcgtgctgtgtgatttcacaaccagcgtgagccgaag     | 799                      |          |       |
| EMBOSS_001 | 23           | -----                                               | 22                       |          |       |

Figure S2(o): Snapshot shows alignment of *miR-1* miRNA with *mTOR* mRNA (available at <https://www.ebi.ac.uk>)

European Bioinformatics Institute [GB] | [https://www.ebi.ac.uk/Tools/services/web/toolresult.ebi?jobId=emboss\\_needle-l20190707-111209-0231-78967558-p2m](https://www.ebi.ac.uk/Tools/services/web/toolresult.ebi?jobId=emboss_needle-l20190707-111209-0231-78967558-p2m)

| Input form | Web services | Help & Documentation                               | Bioinformatics Tools FAQ | Feedback | Share |
|------------|--------------|----------------------------------------------------|--------------------------|----------|-------|
| EMBOSS_001 | 1201         | gtgttcagagacttgatggaggagaaatttgatcaggtgtgccagtggg  | 1250                     |          |       |
| EMBOSS_001 | 1            | -----                                              | 0                        |          |       |
| EMBOSS_001 | 1251         | tgctgaaatgcaggaatagcaagaactcgtgatccaaatgacaatcctt  | 1300                     |          |       |
| EMBOSS_001 | 1            | -----                                              | 0                        |          |       |
| EMBOSS_001 | 1301         | aatttggtgccccgcttggtgcattccgaccttctgccttcacagatac  | 1350                     |          |       |
| EMBOSS_001 | 1            | -----                                              | 0                        |          |       |
| EMBOSS_001 | 1351         | ccagtatctccaagataccatgaacctgtcctaagctgtgtcaagaagg  | 1400                     |          |       |
| EMBOSS_001 | 1            | -----                                              | 0                        |          |       |
| EMBOSS_001 | 1401         | agaaggaaagtacagcggccttccaagccctggggctactttctgtggct | 1450                     |          |       |
| EMBOSS_001 | 1            | -----UGGGAACAUAC-                                  | 12                       |          |       |
| EMBOSS_001 | 1451         | gtgaggtctgagtttaaggtctattgcctcgcgtgctggacatcatcg   | 1500                     |          |       |
| EMBOSS_001 | 13           | UUCUUUAUAGCCCAUAGGAC---CUGCUAAGCUAUGGAUUAAGA       | 58                       |          |       |
| EMBOSS_001 | 1501         | agcggccctgccccaaaggacttcgccataaaggcagaaggcaalgc    | 1550                     |          |       |
| EMBOSS_001 | 59           | AGUAUGUAUUCUA-----                                 | 71                       |          |       |
| EMBOSS_001 | 1551         | aggTggatgc-cacagtcttcacttgcatcagcatgctggctcgagcaat | 1599                     |          |       |
| EMBOSS_001 | 72           | -----                                              | 71                       |          |       |
| EMBOSS_001 | 1600         | ggggccaggcatccagcaggatatcaaggagctgctggagcccatgctgg | 1649                     |          |       |
| EMBOSS_001 | 72           | -----                                              | 71                       |          |       |
| EMBOSS_001 | 1650         | cagtgggactaagccctgccctcactgcagtgtctacacctgagccgt   | 1699                     |          |       |
| EMBOSS_001 | 72           | -----                                              | 71                       |          |       |

figure S3: Snapshot shows alignment between lncRNA and the 2 guides, flanking the sequence of lncRNA and miRNAs interaction (available at <https://www.ebi.ac.uk>).

## 1<sup>st</sup> guide alignment with lncRNA

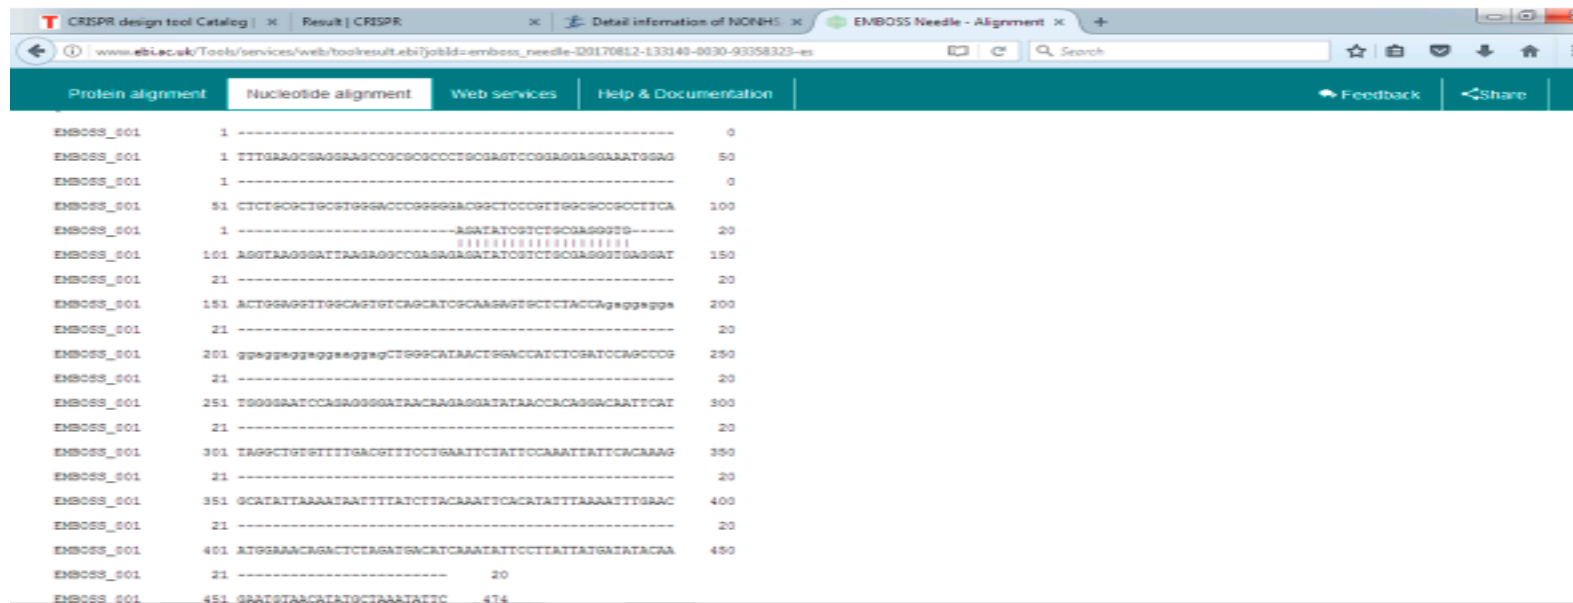

The screenshot displays the EMBOS Needle Alignment tool interface. The browser address bar shows the URL: [www.ebi.ac.uk/Tools/services/web/toolresult/ebiJobId=emboss\\_needle-320170812-133140-0030-93358323-es](https://www.ebi.ac.uk/Tools/services/web/toolresult/ebiJobId=emboss_needle-320170812-133140-0030-93358323-es). The interface includes tabs for 'Protein alignment', 'Nucleotide alignment' (selected), 'Web services', and 'Help & Documentation'. There are also links for 'Feedback' and 'Share'.

The alignment results are displayed in a table with three columns: the guide sequence identifier, the alignment score, and the aligned nucleotide sequences. The guide sequence is 'ENSOSS\_001' and the lncRNA sequence is '1'. The alignment score is 474.

| Guide      | Score | Sequence                                         |
|------------|-------|--------------------------------------------------|
| ENSOSS_001 | 1     | -----                                            |
| ENSOSS_001 | 1     | TTTGAAGCAGGAGAGCCGCGCGCCTGCGAGTCCGGAGGAGAAATGGAG |
| ENSOSS_001 | 1     | -----                                            |
| ENSOSS_001 | 51    | CTCTGCGCTGCGTGGGACCCGCGGACGGCTCCGCTTGGCGCGCCTTCA |
| ENSOSS_001 | 1     | -----AGATATCTCTGCGAGGGT-----                     |
| ENSOSS_001 | 101   | AGGTAAGGATTAGAGGCGCGAGAGATATCTCTGCGAGGGTGAAGAT   |
| ENSOSS_001 | 21    | -----                                            |
| ENSOSS_001 | 151   | ACTGAGGCTTGGCAGTGTCTAGCATGCGAGGCTCTTACCAgggggga  |
| ENSOSS_001 | 21    | -----                                            |
| ENSOSS_001 | 201   | ggggggggggggggggCTGGGATAACTGGACCACTCTGATCCAGCCCG |
| ENSOSS_001 | 21    | -----                                            |
| ENSOSS_001 | 251   | TGGGGAATCCAGGCGGATACAGAGGATATACCCAGGACATTTCAT    |
| ENSOSS_001 | 21    | -----                                            |
| ENSOSS_001 | 301   | TAGGCTGTGTTTTGACGTTTCTGAATTCTATCCAAATTAATCAGAG   |
| ENSOSS_001 | 21    | -----                                            |
| ENSOSS_001 | 351   | GCATATTAAATAATTTTATCTTACAGATTACATATTAAATTTGAC    |
| ENSOSS_001 | 21    | -----                                            |
| ENSOSS_001 | 401   | ATGGAACAGACTCTAGATGACATCAATATTCCTTATTATGATATACA  |
| ENSOSS_001 | 21    | -----20                                          |
| ENSOSS_001 | 451   | GGATGTAACATATGCTAAATATTC474                      |

## 2<sup>nd</sup> guide alignment with lncRNA

| CRISPR design tool Catalog   Detail information of NONHE   Result   CRISPR   EMBOS Needle - Alignment  |                                                         |              |                      |                  |
|--------------------------------------------------------------------------------------------------------|---------------------------------------------------------|--------------|----------------------|------------------|
| www.ebi.ac.uk/Tools/services/web/toolresult.xbit?jobId=emboss_needle-120170812-133513-9694-95386942-ey |                                                         |              |                      |                  |
| Protein alignment                                                                                      | Nucleotide alignment                                    | Web services | Help & Documentation | Feedback   Share |
| EMBOS_001                                                                                              | 1 TTTGAAGCGAGGAAGCGCGCGCCCTGCGAGTCCGGAGGAGGAATGGAG      | 50           |                      |                  |
| EMBOS_001                                                                                              | 1 -----                                                 | 0            |                      |                  |
| EMBOS_001                                                                                              | 51 CTCTGCGCTGCGTGGGACCCGCGGGACCGCTCCCGTTGGCGCGCCCTTCA   | 100          |                      |                  |
| EMBOS_001                                                                                              | 1 -----                                                 | 0            |                      |                  |
| EMBOS_001                                                                                              | 101 AGGTAAAGGGATTAAAGAGCCGAGAGAGATATCGTCTGCGAGGGTGAAGAT | 150          |                      |                  |
| EMBOS_001                                                                                              | 1 -----                                                 | 0            |                      |                  |
| EMBOS_001                                                                                              | 151 ACTGGAGGTTGGCAGTGTGAGCATGCGAAGAGTGCCTACCAgggggga    | 200          |                      |                  |
| EMBOS_001                                                                                              | 1 -----                                                 | 0            |                      |                  |
| EMBOS_001                                                                                              | 201 ggggggggaggaggagCTGGGCATAACTGGACCATCTGATCCAGCCCG    | 250          |                      |                  |
| EMBOS_001                                                                                              | 1 -----                                                 | 0            |                      |                  |
| EMBOS_001                                                                                              | 251 TGGGGATCCAGAGGGGATACAGAGGATATAACCCAGGACATTCAT       | 300          |                      |                  |
| EMBOS_001                                                                                              | 1 -----                                                 | 0            |                      |                  |
| EMBOS_001                                                                                              | 301 TAGGCTGGTTTTTGAGGTTTCTGAAATTCATGCAAAATTCACAAAG      | 350          |                      |                  |
| EMBOS_001                                                                                              | 1 -----                                                 | 0            |                      |                  |
| EMBOS_001                                                                                              | 351 GCATATTAAATTAATTTTATCTTACAAATTCACATATTTAAATTTGAC    | 400          |                      |                  |
| EMBOS_001                                                                                              | 1 -----CTGCGAGCGATATC-----TCTCT-----                    | 20           |                      |                  |
| EMBOS_001                                                                                              | 401 ATGGAAACAGACTC-TAGATGACATCAAAATATTC-CTTATTATGATATAC | 448          |                      |                  |
| EMBOS_001                                                                                              | 21 -----                                                | 20           |                      |                  |
| EMBOS_001                                                                                              | 449 AAGAAATGTAAATATGCTAAATATTC                          | 474          |                      |                  |

Table S2: Sequences of the forward and reverse primers of the 2 guide RNAs:

| <u>Sequence</u>                        | <u>Primer name</u>                      | <u>GUIDE</u>                |
|----------------------------------------|-----------------------------------------|-----------------------------|
| TAATACGACTCACTATAGAGATATCGTCTG<br>CGAG | IVT-NONHSAT0584-gRNA-<br>T1- <u>fwd</u> | <u>1<sup>st</sup> guide</u> |
| TTCTAGCTCTAAAACCCCTCGCAGACGA<br>TATC   | IVT-NONHSAT0584-gRNA-<br>T1- <u>rev</u> |                             |
| TAATACGACTCACTATAGCTCGCAGACGAT<br>ATCT | IVT-NONHSAT0584-gRNA-<br>T5- <u>fwd</u> | <u>2<sup>nd</sup> guide</u> |
| TTCTAGCTCTAAAACAGAGAGATATCGTCT<br>GCGA | IVT-NONHSAT0584-gRNA-<br>T5- <u>rev</u> |                             |
